# Supplementary material for: BRCA1 mediates protein homeostasis through the ubiquitination of PERK and IRE1
Source: PubMed Central journal article supplement — iScience. 2022 Nov 19;25(12):105626. doi: 10.1016/j.isci.2022.105626 (PMC9719099; doi:10.1016/j.isci.2022.105626), 2022-11-19
Supplement: mmc1.pdf [file mmc1.pdf]

iScience, Volume 25

## **Supplemental information**

### **BRCA1 mediates protein homeostasis through the ubiquitination of PERK and IRE1**

**Robert Hromas, Gayathri Srinivasan, Ming Yang, Aruna Jaiswal, Taylor A. Totterdale, Linda Phillips, Austin Kirby, Nazli Khodayari, Mark Brantley, Elizabeth A. Williamson, and Kimi Y. Kong**

## SUPPLEMENTAL FIGURE LEGENDS

**Figure S1. High level of unfolded proteins was detected in BRCA1-def breast cancer cells,** Related to Figure 1.

(A-B) HCC1937 (+ or <sup>def</sup>) breast cancer cells were treated with TPE-MI and analyzed by microscopy (A) or flow cytometry (B). Scale = 20  $\mu$ M.

(C) quantitative analysis of the signal intensity of TPE-MI fluorescence in labeled cells.

(D) quantitative analysis of the TPE-MI-high cell population detected by flow cytometry.

Data are displayed as means  $\pm$  SD.

TPE = TPE-MI. Con-A = concanavalin-A. + = BRCA1-replete. <sup>def</sup> = BRCA1-deficient.

**Figure S2. Confocal microscopic images of BRCA1 and DERL1 in MDA-MB-231 breast cancer cells,** Related to Figure 1.

(A) Upper panel, single-color channels of cancer cells in white background. Lower panel, series of z-stack images in black background. Z depth between scans was 0.6  $\mu$ m.

All cells were counterstained with DAPI (blue). Scale = 5  $\mu$ M. Green = GFP-KDEL.

**Figure S3. Confocal microscopic images of BRCA1 and DERL1 in MCF7 breast cancer cells,** Related to Figure 1.

(A) Top panel, **a**, cancer cells were immunostained with BRCA1 (red) and DERL1 (yellow) antibodies. **b**, cells were immunostained with secondary antibodies conjugated with fluorophores as control. Middle panel, single-color channels in white background. Lower panel, series of z-stack images of MCF7 cancer cells in black background. Z depth between scans was 0.6  $\mu$ m.

All cells were counterstained with DAPI (blue). Scale = 5  $\mu$ M. Green = GFP-KDEL.

**Figure S4. BRCA1 does not mediate ubiquitination of SEL1L and DERLIN-1,** Related to Figure 1.

(A) Reverse IP assays using SEL1L antibodies to co-IP BRCA1 protein from cytoplasmic extract isolated from MCF7 cells.

(B) Reverse IP assays using DERL1 antibodies to co-IP BRCA1 protein from cytoplasmic extract isolated from MCF7 cells. IB = immunoblotting.

Ig = non-specific immunoglobulin fragments. IgG(H) & IgG(L) = heavy and light chains. BRCA1 IB: \*\* = truncated BRCA1. \*\*\* = delta11q isoform.

(C-D) Ubiquitination analysis on SEL1L and DERL1 using protein extract from control or BRCA1 siRNA-transfected MCF7 cells (**C**) or MDA-MB-231 cells (**D**). Co-IP reaction was carried out using agarose beads conjugated with Ubiquitin (Ub) monoclonal antibody and immunoblotted with either SEL1L or DERL1 antibodies.

DERL1 = DERLIN-1. IP = immunoprecipitation. IB = immunoblotting.

**Figure S5. Protein and mRNA levels of PERK and IRE1 in BRCA1 under- or over-expressing breast cancer cells,** Related to Figure 2.

(A-C) Quantitative analysis of PERK and IRE1 protein levels in transient transfected cells from Fig. 2A-C. A, control or BRCA1-depleted MDA-MB-231 cells. B, control or BRCA1-depleted MCF7 cells. C, untreated MDA-MB-436 BRCA1+ and BRCA1-def cells. Protein expression signal intensities were quantified by ImageJ and normalized by expression of GAPDH.

(D-E) qRT-PCR analysis of BRCA1, PERK, IRE1 and BARD1 mRNA expression in breast cancer cells. D, cDNAs were generated from mRNAs isolated from control or BRCA1-depleted cancer cells. E, cDNAs were generated from mRNAs isolated from control, BRCA1-overexpressing or BARD1-overexpression MDA-MB-436 BRCA1-def cancer cells. cDNA levels were normalized by expression of housekeeper gene GAPDH. Data are displayed as means  $\pm$  SD. P value was calculated by Student's two-tailed, unpaired *t*-test. (\* < 0.05, \*\* < 0.01, \*\*\* < 0.001).

**Figure S6. BRCA1 protein interacts with and ubiquitinates PERK and IRE1,** Related to Figure 2.

(A) Reverse IP assays using PERK or IRE1 antibodies to co-IP BRCA1 protein from cytoplasmic extract isolated from MCF7 cells. IRE1 IB: \* = possible ubiquitinated IRE1.

(B) **a**, Western blot analysis of proteins isolated from nuclear and ER subcellular fractions. 15  $\mu$ g of nuclear and ER proteins were used for each lane. p300 = nuclear marker. GRP94 = ER marker. **b-d**, Co-IP assays

using protein isolated from MCF7 ER microsomes show BRCA1 protein interacts with PERK and IRE1. BRCA1 IB: \* = hyperphosphorylated BRCA1, \*\* = truncated BRCA1. \*\*\* = delta11q isoform.C

(C) Quantitative analysis of ubiquitination level of PERK and IRE1 proteins in BRCA1-depleted breast cancer cells.

(D) Western blot analysis of total protein extract isolated from control or BRCA1-depleted cells, with or without Bortezomib treatment. Equal amounts of total protein extract were loaded into each lane.

(E) In vitro Ubiquitination Assay of NSP15 protein with BRCA1/BARD1 as E3 ligase. Full-length NSP15 was incubated with E1, UBE2J1, BRCA1, BARD1 and/or Ubiquitin. Ubiquitin or ubiquitinated protein was detected with an anti-Ub antibody. NSP protein was detected using anti-Strept-tactin antibody.

Data are displayed as means  $\pm$  SD. P value was calculated by Student's two-tailed, unpaired *t*-test. (\* < 0.05, \*\* < 0.01, \*\*\* < 0.001).

IP = immunoprecipitation. IN = Input. Ig = non-specific immunoglobulin fragments. Bortez = Bortezomib. Ub = Ubiquitin. IB = immunoblotting. Ub = ubiquitin.

**Figure S7. Lower BARD1 protein level was detected in BRCA1-def cancer cells compared to BRCA1-replete cells,** Related to Figure 2.

(A) Western blot analysis of BARD1 protein expression in BRCA1-replete (+) and BRCA1-deficient (-def) breast cancer cells.

(B) quantitative analysis of BARD1 protein expression normalized with GAPDH.

436+ = MDA-MB-436 BRCA1-replete. 436-def = MDA-MB-436 BRCA1-deficient. 1937+ = HCC1937 BRCA1-replete. 1937-def = HCC1937 BRCA1-deficient.

Data are displayed as mean  $\pm$  SD. P value was calculated by Student's two-tailed, unpaired *t*-test. (\*\* < 0.01).

IB = immunoblotting.

**Figure S8. Depleting UPR components is lethal in the BRCA1-def cancer cells,** Related to Figure 3.

(A) Depletion of CypB induced severe synthetic lethality in SUM149PT and UWB1.289 BRCA1-def cancer cells. Left panels, Western blot analysis. Middle panels, representative images of colony forming units (CFUs) from control or CypB knock-down cancer cells after 12 days culturing. Right panels, quantitative analysis of the clonal colony formation assay.

(B) Western blot analysis of the UPR or ERAD markers in cells targeted by control or gene specific siRNA. a, MDA-MB-436 BRCA1+ (lanes 1-3) and MDA-MB-436 BRCA1-def (lanes 4-6) cells. b, HCC1937 BRCA1-def (lanes 1-2) and SUM149PT BRCA1-def (lanes 3-4) cells. c, HCC1937 BRCA1-def cells. d, MDA-MB-436 BRCA1-def (left), HCC1937 BRCA1-def (Middle) and SUM149PT BRCA1-def (right) cells. e, MDA-MB-436 BRCA1+ cells. f, MDA-MB-436 BRCA1-def (lanes 1-2), HCC1937 BRCA1-def (lanes 3-4) and SUM149PT BRCA1-def (lanes 5-8). BiP = GRP78. CypB = cyclophilin B. DERL1 = DERLIN-1.

Results were calculated as means  $\pm$  SD. P value was calculated by student's *t*-test. (\*\*\*) < 0.001).

**Figure S9. Analysis of UPR components protein and mRNA level in untreated, DMSO-treated or CsA-treated MDA-MB-436 breast cancer cells,** Related to Figure 5.

BRCA1-replete (+) and BRCA1-deficient (-def) breast cancer cells were either untreated, treated with DMSO (vehicle) or treated with 1  $\mu$ M CsA for 2 days. Cells were harvested for (A) protein or (B) mRNAs analysis. p-PERK = phospho-PERK. p-IRE1 = phospho-IRE1. p-eIF2a = phospho-eIF2a. sp XBP1 = spliced XBP1. IB = immunoblotting.

Results were calculated as means  $\pm$  SD. P value was calculated by student's *t*-test.

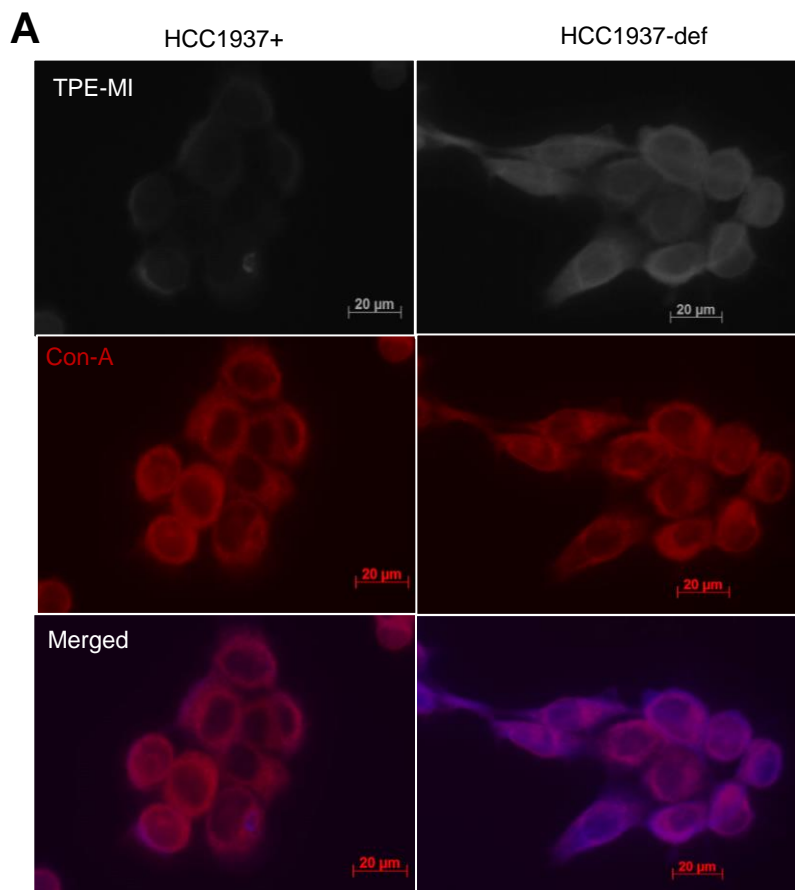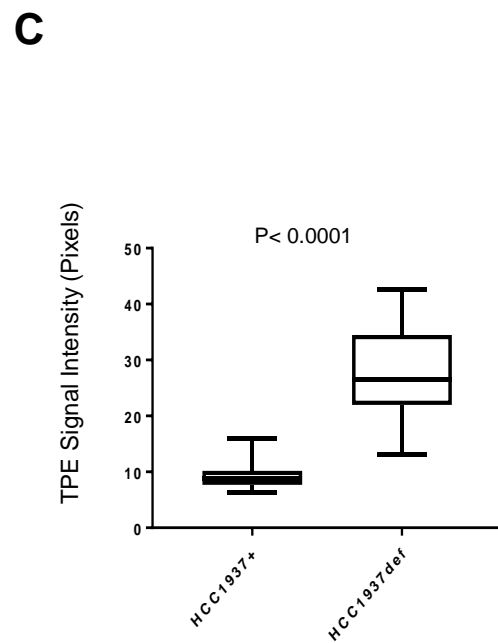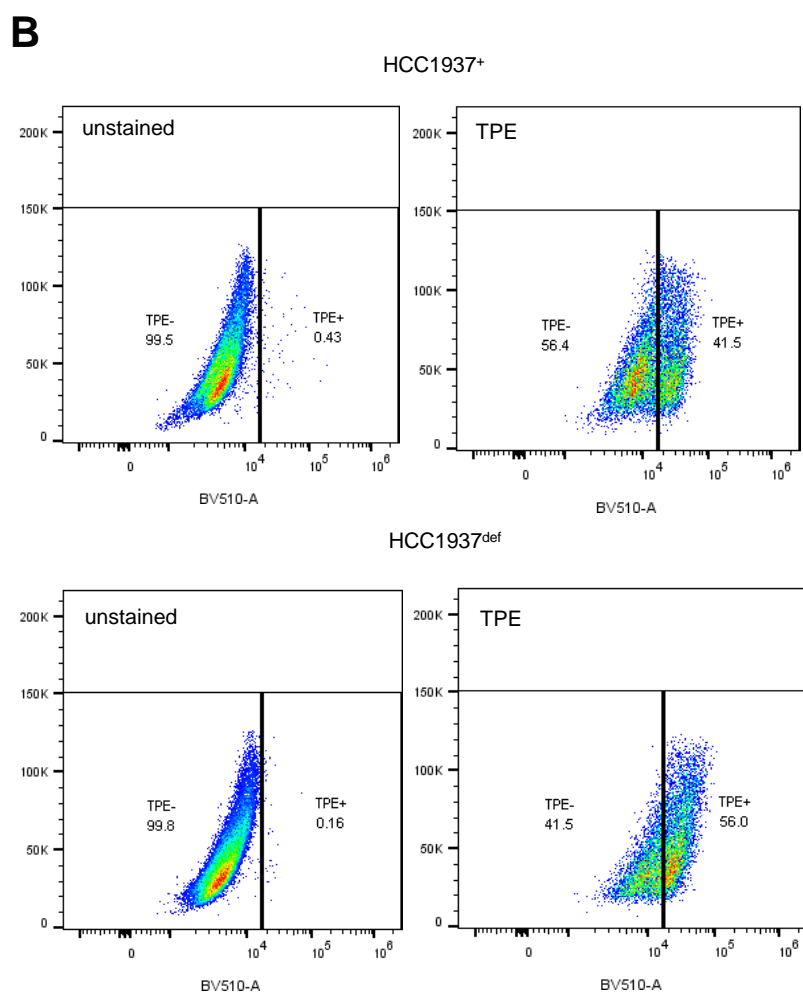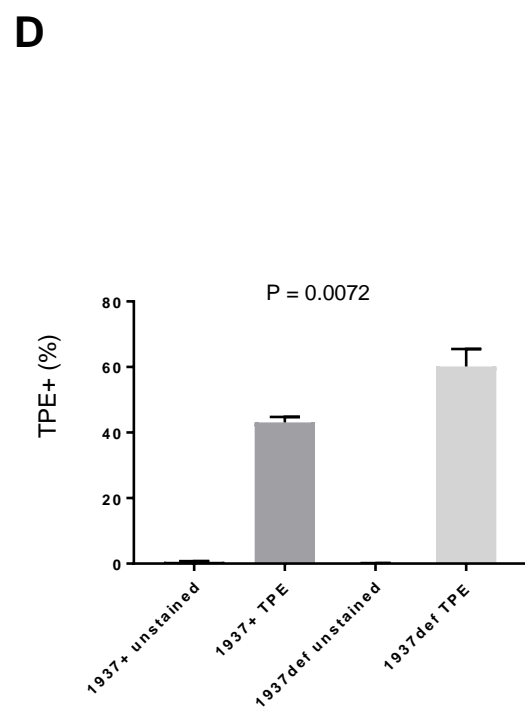

**Figure S1**

**Figure S1. High level of unfolded proteins was detected in the BRCA1-def breast cancer cells,** Related to Figure 1.

(A-B) HCC1937 (+ or def) breast cancer cells were treated with TPE-MI and analyzed by microscopy (A) or flow cytometry (B). Scale = 20  $\mu$ M.

(C) quantitative analysis of the signal intensity of TPE-MI fluorescence in labeled cells.

(D) quantitative analysis of the TPE-MI-high cell population detected by flow cytometry.

Data are displayed as means  $\pm$  SD.

TPE = TPE-MI. Con-A = concanavalin-A. + = BRCA1-replete. Def = BRCA1-deficient.

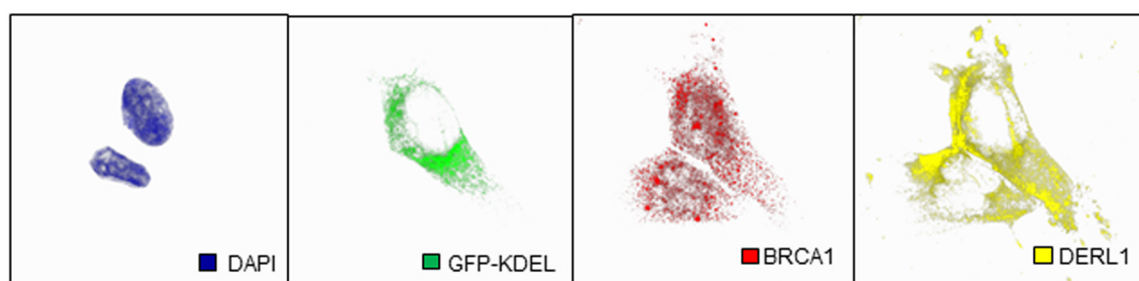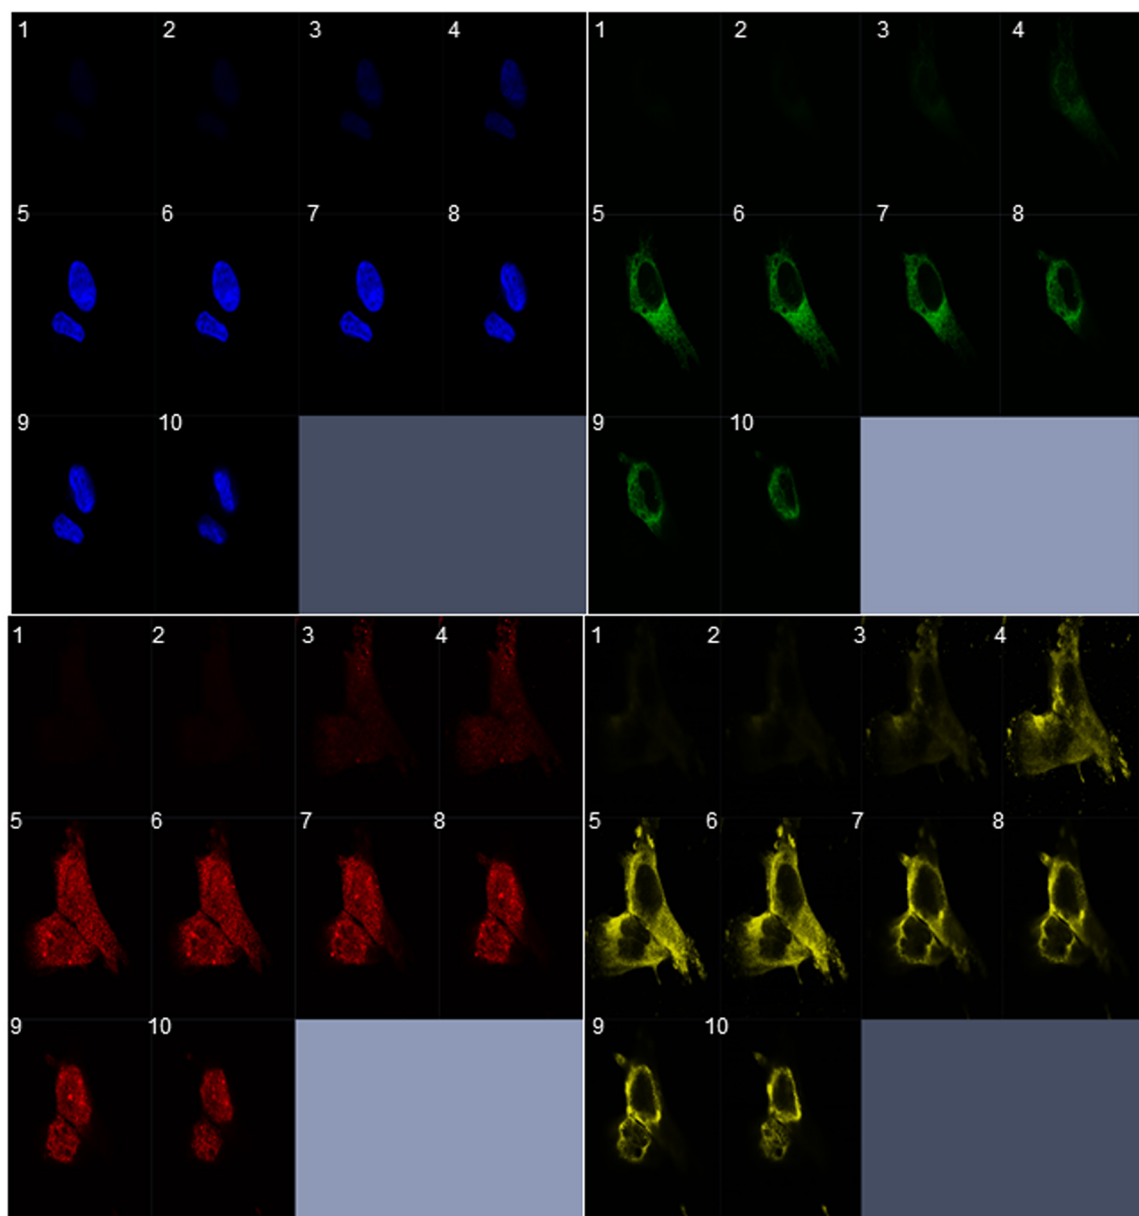

Figure S2

**Figure S2. Confocal microscopic images of BRCA1 and DERL1 in MDA-MB-231 breast cancer cells, Related to Figure 1.**

(A) Top panel, single-color channels of cancer cells in white background.

Bottom panel, series of z-stack images in black background. Z depth between scans was 0.6  $\mu\text{m}$ .

All cells were counterstained with DAPI (blue). Scale = 5  $\mu\text{M}$ . Green = GFP-KDEL.

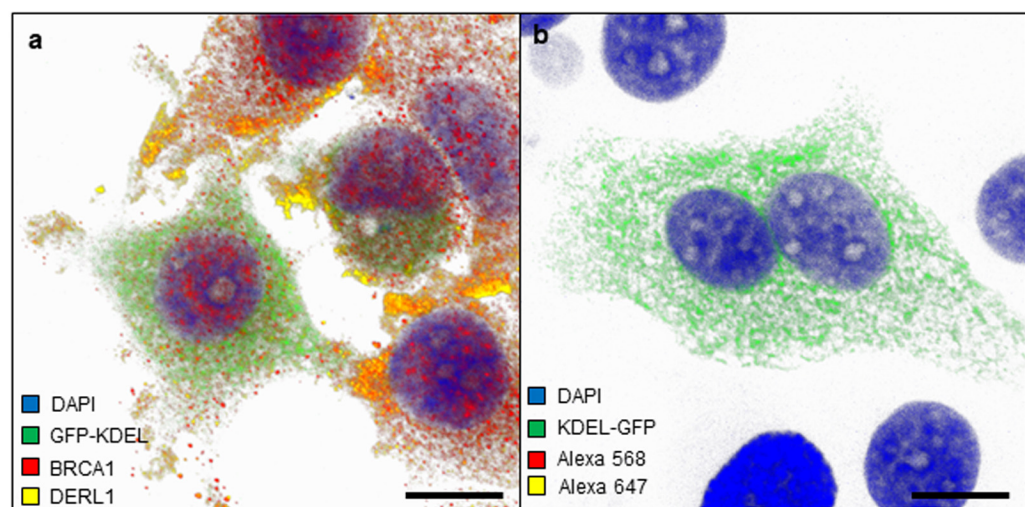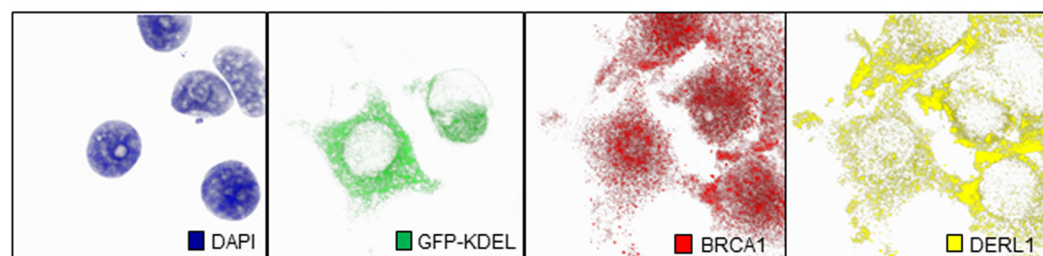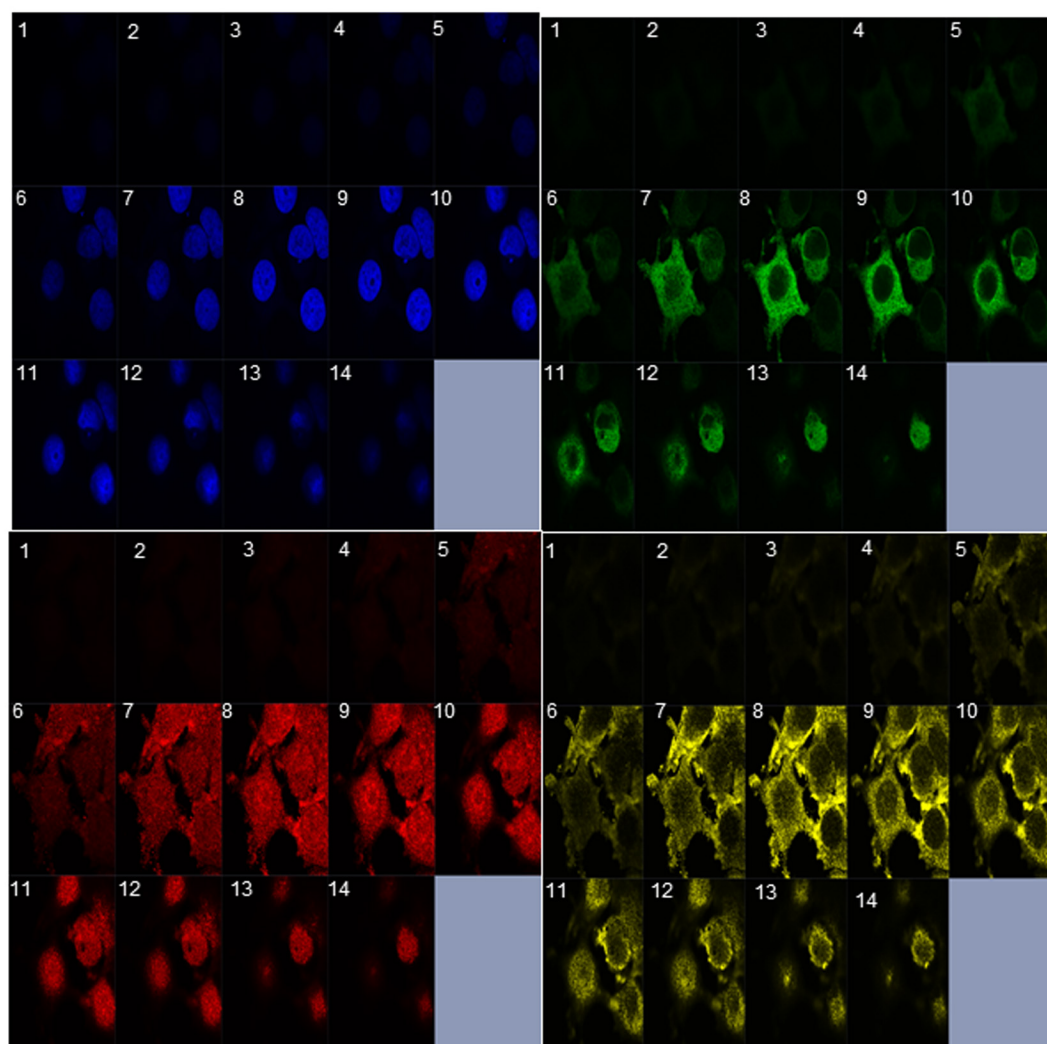

Figure S3



**Figure S3. Confocal microscopic images of BRCA1 and DERL1 in MCF7 breast cancer cells, Related to Figure 1.**

(A) Top panel, **a**, *cancer* cells were immunostained with BRCA1 (red) and DERL1 (yellow) antibodies. **b**, cells were immunostained with secondary antibodies conjugated with fluorophores as control. Middle panel, single-color channels in white background. Bottom panel, series of z-stack images in black background. Z depth between scans was 0.6  $\mu\text{m}$ .

All cells were counterstained with DAPI (blue). Scale = 5  $\mu\text{M}$ . Green = GFP-KDEL.

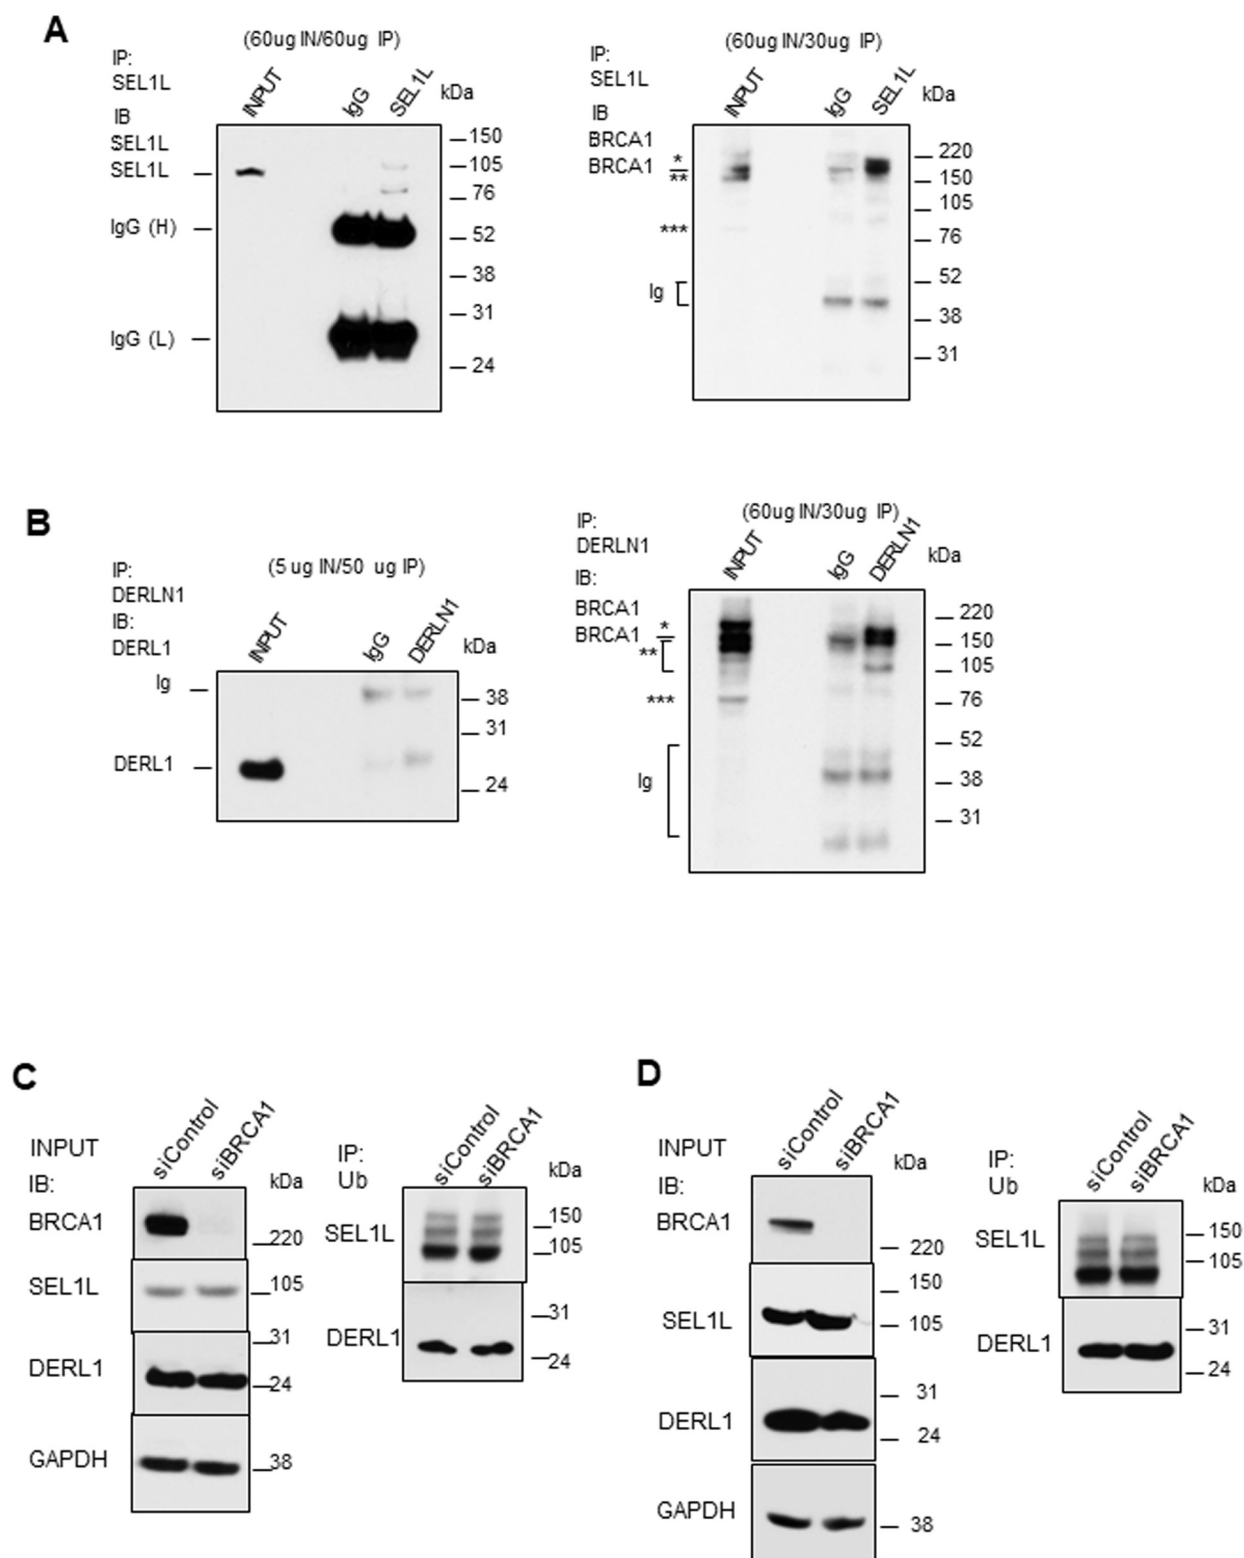

Figure S4

**Figure S4. BRCA1 does not mediate ubiquitination of SEL1L and DERLIN-1,**  
Related to Figure 1.

(A) Reverse IP assays using SEL1L antibodies to co-IP BRCA1 protein from cytoplasmic extract isolated from MCF7 cells.

(B) Reverse IP assays using DERL1 antibodies to co-IP BRCA1 protein from cytoplasmic extract isolated from MCF7 cells. IB = immunoblotting.

Ig = non-specific immunoglobulin fragments. IgG(H) & IgG(L) = heavy and light chains. BRCA1 IB: \*\* = truncated BRCA1. \*\*\* = delta11q isoform.

(C-D) Ubiquitination analysis on SEL1L and DERL1 using protein extract from control or BRCA1 siRNA-transfected MCF7 cells (**C**) or MDA-MB-231 cells (**D**). Co-IP reaction was carried out using agarose beads conjugated with Ubiquitin (Ub) monoclonal antibody and immunoblotted with either SEL1L or DERL1 antibodies. DERL1 = DERLIN-1. IP = immunoprecipitation. IB = immunoblotting.

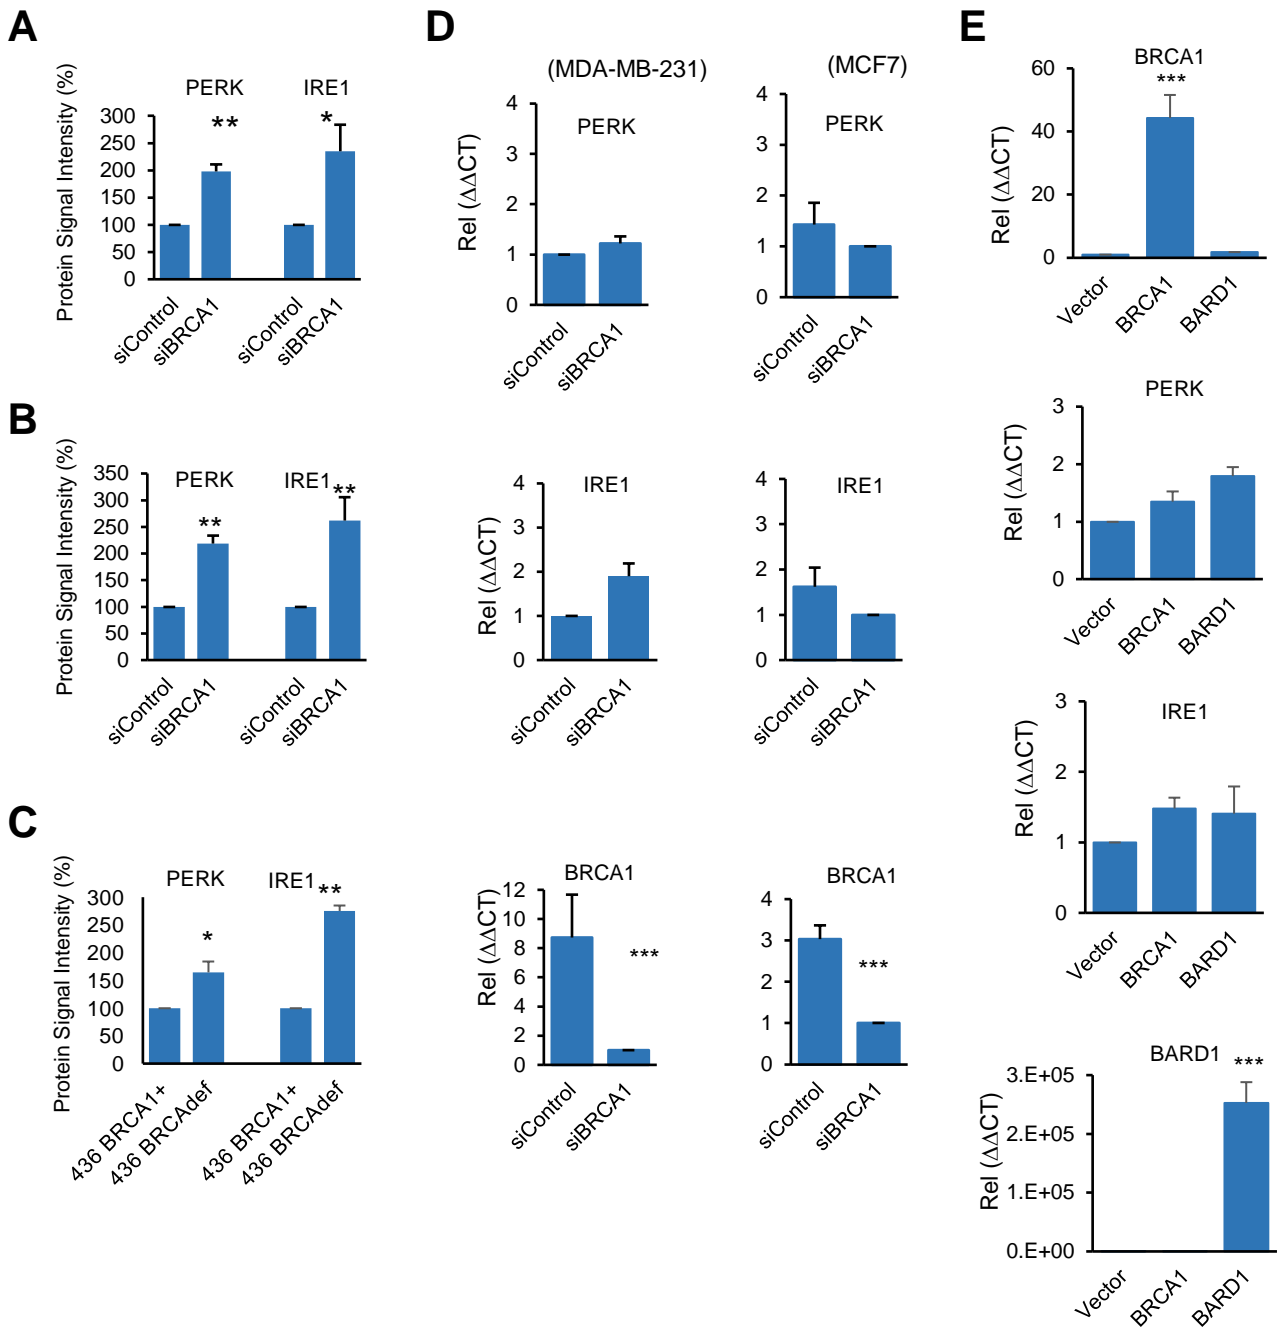

Figure S5

**Figure S5. Protein and mRNA levels of PERK and IRE1 in BRCA1 under- or over-expressing breast cancer cells, Related to Figure 2.**

(A-C) Quantitative analysis of PERK and IRE1 protein levels in transiently transfected cells from Fig. 2A-C. A, control or BRCA1-depleted MDA-MB-231 cells. B, control or BRCA1-depleted MCF7 cells. C, untreated MDA-MB-436 BRCA1+ and BRCA1-def cells. Protein expression signal intensities were quantified by ImageJ and normalized by expression of GAPDH.

(D-E) qRT-PCR analysis of BRCA1, PERK, IRE1 and BARD1 mRNA expression in breast cancer cells. D, cDNAs were generated from mRNAs isolated from control or BRCA1-depleted cancer cells. E, cDNAs were generated from mRNAs isolated from control, BRCA1-overexpressing or BARD1-overexpression MDA-MB-436 BRCA1-deficient cancer cells. cDNA levels were normalized by expression of housekeeper gene GAPDH.

Data are displayed as means  $\pm$  SD. P value was calculated by Student's two-tailed, unpaired *t*-test. (\* < 0.05, \*\* < 0.01, \*\*\* < 0.001).

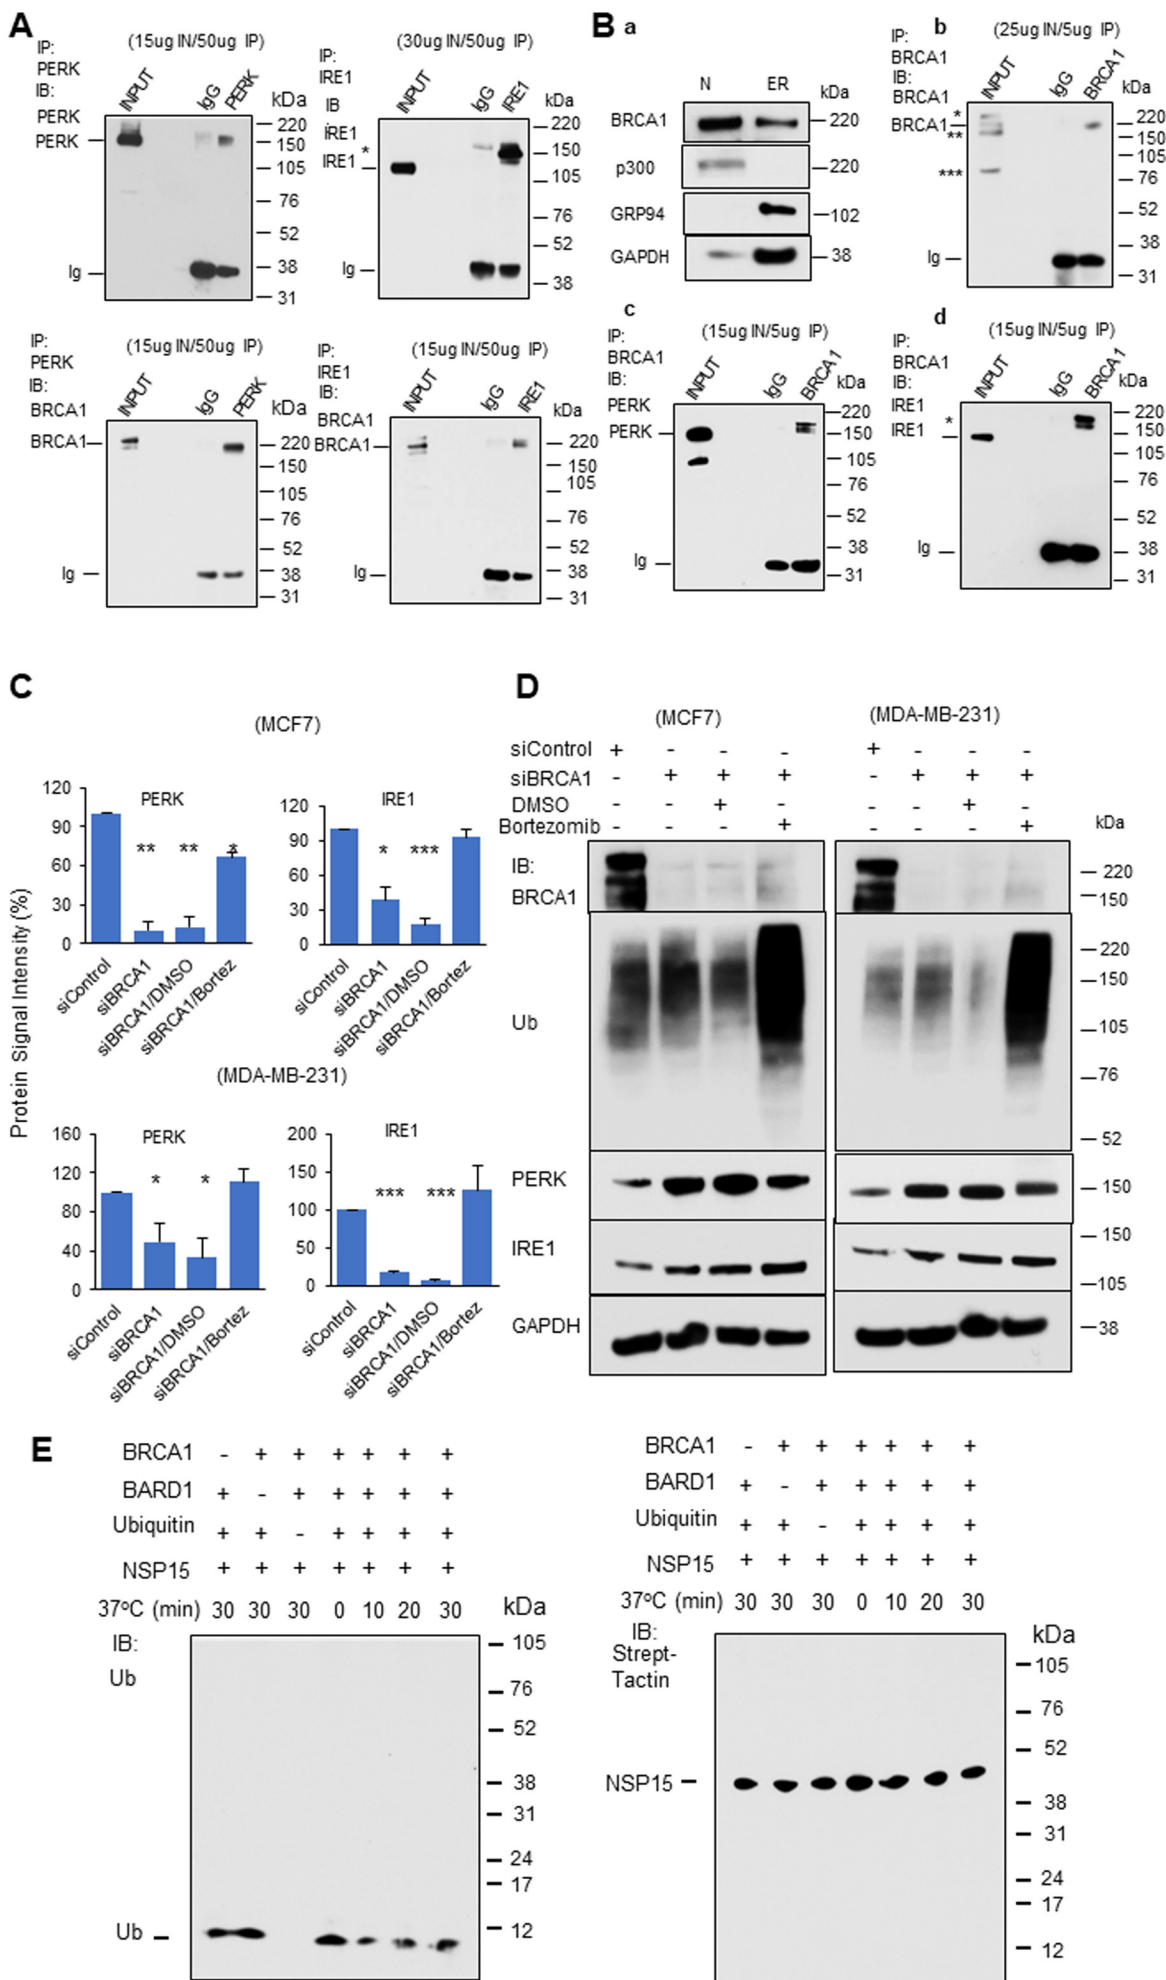

Figure S6

**Figure S6. BRCA1 protein interacts with and ubiquitinates PERK and IRE1,**  
Related to Figure 2.

(A) Reverse IP assays using PERK or IRE1 antibodies to co-IP BRCA1 protein from cytoplasmic extract isolated from MCF7 cells. IRE1 IB: \* = ubiquitinated IRE1.

(B) **a**, Western blot analysis of proteins isolated from nuclear or ER subcellular fractions. 15  $\mu$ g of nuclear or ER proteins were used for each lane. P300 = nuclear marker. GRP94 = ER marker. **b-d**, Co-IP assays show BRCA1 protein interacts with PERK and IRE1 in MDA-MB-231 breast cancer cells. IB = immunoblotting.

(C) Quantitative analysis of ubiquitination level of PERK and IRE1 proteins in BRCA1-depleted breast cancer cells.

(D) Western blot analysis of total protein extract isolated from control or BRCA1-depleted cells, with or without Bortezomib treatment. Equal amounts of total protein extract were loaded into each lane.

(E) In vitro Ubiquitination Assay of NSP15 protein with BRCA1/BARD1 as E3 ligase. Full-length NSP15 was incubated with E1, UBE2J1, BRCA1, BARD1 and/or ubiquitin. Ubiquitin or ubiquitinated protein was detected with an anti-Ub antibody. NSP protein was detected using anti-Strept-tactin antibody.

Data are displayed as means  $\pm$  SD. P value was calculated by Student's two-tailed, unpaired *t*-test. (\* < 0.05, \*\* < 0.01, \*\*\* < 0.001).

IP = immunoprecipitation. IN = Input. Ig = non-specific immunoglobulin fragments. Bortez = Bortezomib. Ub = Ubiquitin. IB = immunoblotting. Ub = ubiquitin.

**A**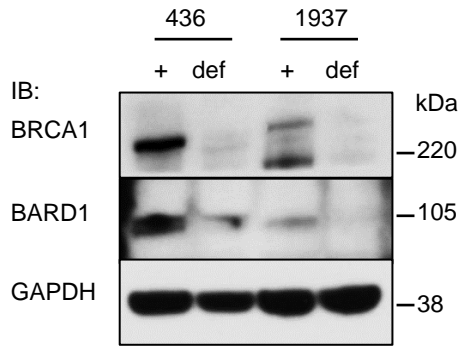**B**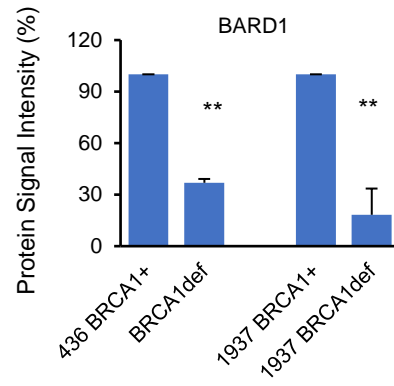**Figure S7**



**Figure S7. Lower BARD1 protein level was detected in BRCA1-def cancer cells compared to BRCA1-replete cells, Related to Figure 2.**

(A) Western blot analysis of BARD1 protein expression in BRCA1+ and BRCA1-def breast cancer cells.

(B) quantitative analysis of BARD1 protein expression normalized with GAPDH.

436+ = MDA-MB-436 BRCA1-replete. 436def = MDA-MB-436 BRCA1-deficient.

1937+ = HCC1937 BRCA1-replete. 1937def = HCC1937 BRCA1-deficient.

Data are displayed as mean  $\pm$  SD. P value was calculated by Student's two-tailed, unpaired *t*-test. (\*\* < 0.01).

IB = immunoblotting.

**A**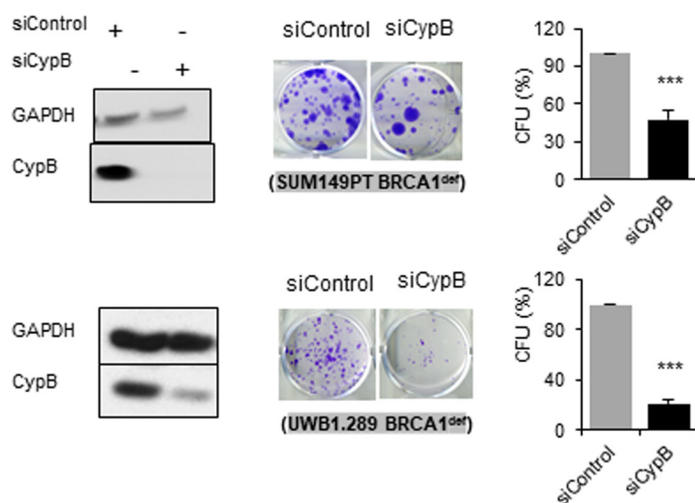**B****a**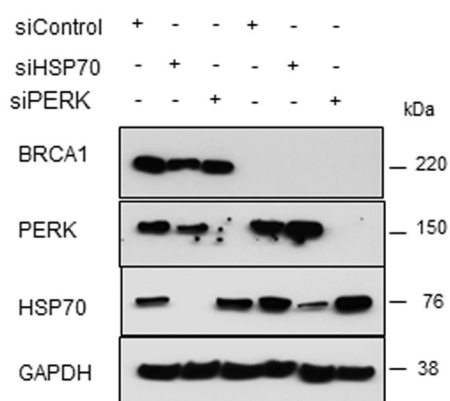**b**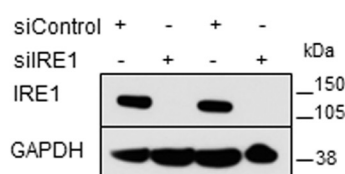**c**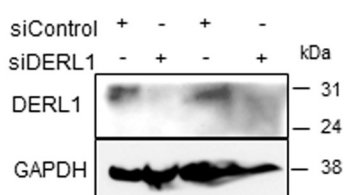**d**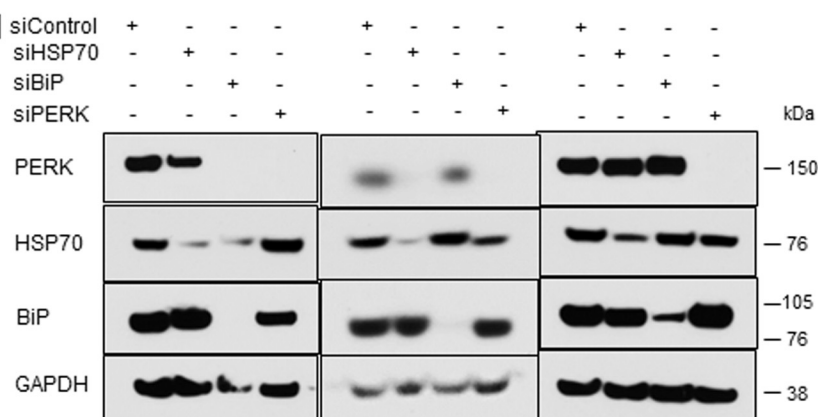**e**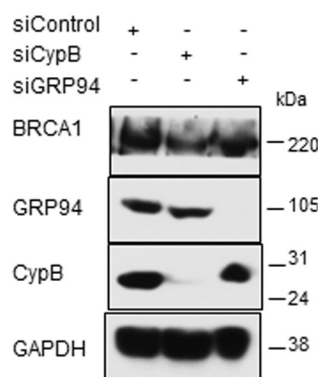**f**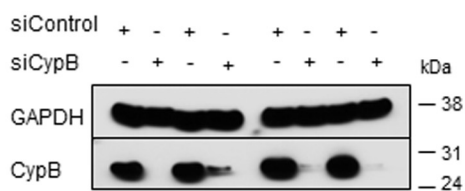**Figure S8**

**Figure S8. Depleting UPR components is lethal in the BRCA1-def cancer cells,**  
Related to Figure 3.

(A) Depletion of CypB induced severe synthetic lethality in SUM149PT and UWB1.289 BRCA1-def cancer cells. Left panels, Western blot analysis. Middle panels, representative images of colony forming units (CFUs) from control or CypB knock-down cancer cells after 12 days culturing. Right panels, quantitative analysis of the clonal colony formation assay.

(B) Western blot analysis of the UPR or ERAD components in cells targeted by control or gene specific siRNA. **a**, MDA-MB-436 BRCA1+ (lanes 1-3) and MDA-MB-436 BRCA1-def (lanes 4-6) cells. **b**, HCC1937 BRCA1-def (lanes 1-2) and SUM149PT BRCA1def (lanes 3-4) cells. **c**, HCC1937 BRCA1-def cells. **d**, MDA-MB-436 BRCA1-def (left), HCC1937 BRCA1-def (Middle) and SUM149PT BRCA1-def (right) cells. **e**, MDA-MB-436 BRCA1+ cells. **f**, MDA-MB-436 BRCA1-def (lanes 1-2), HCC1937 BRCA1-def (lanes 3-4) and SUM149PT BRCA1-def (lanes 5-8). BiP = GRP78. CypB = cyclophilin B. DERL1 = DERLIN-1.

Results were calculated as means  $\pm$  SD. P value was calculated by student's t-test. (\*\*\*) < 0.001).

**A**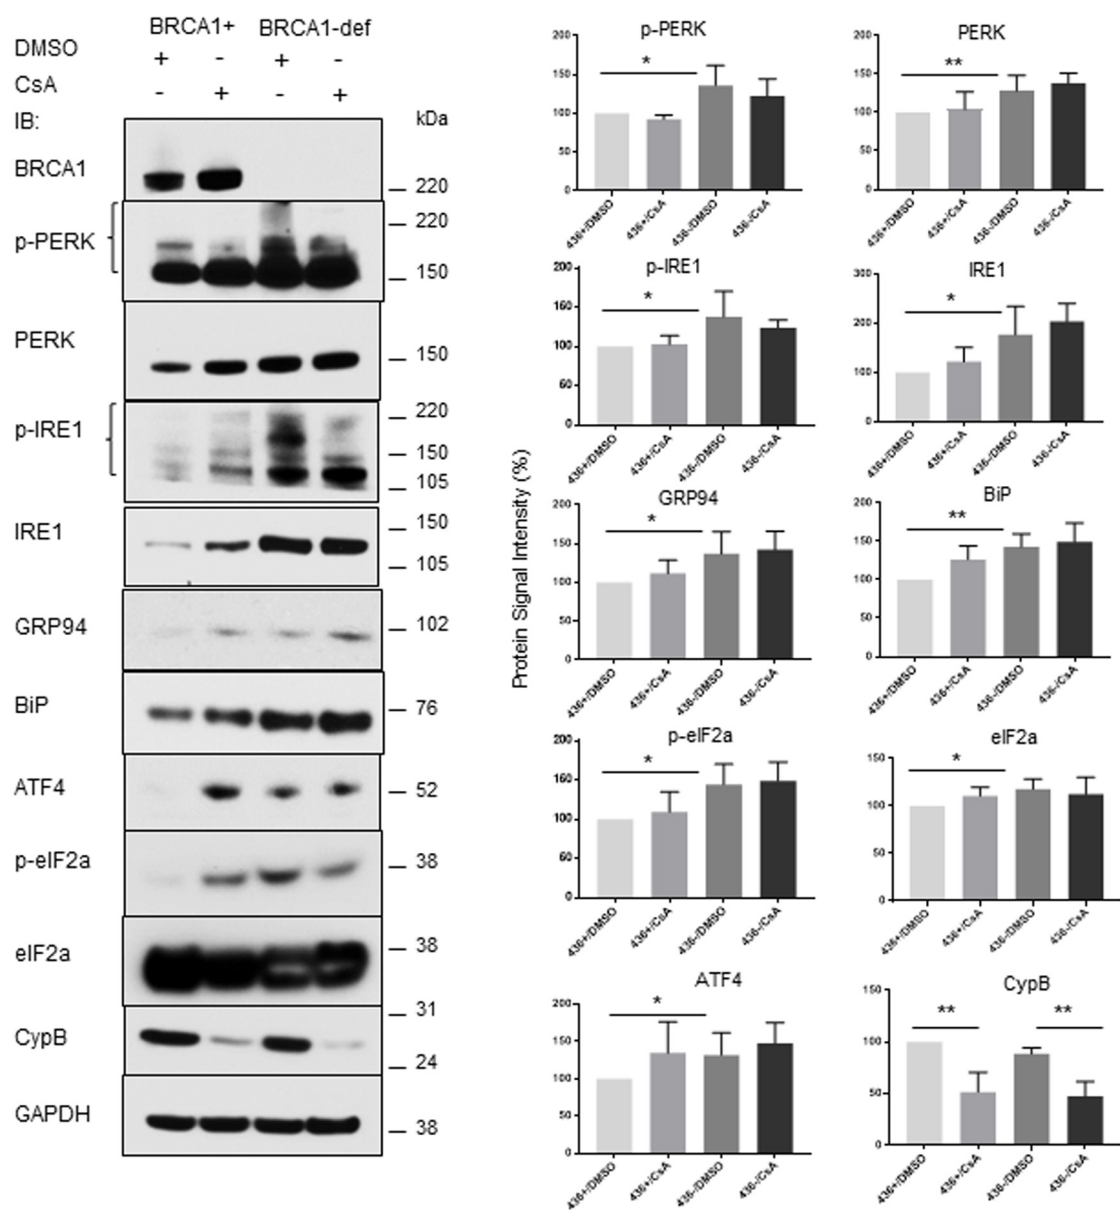**B**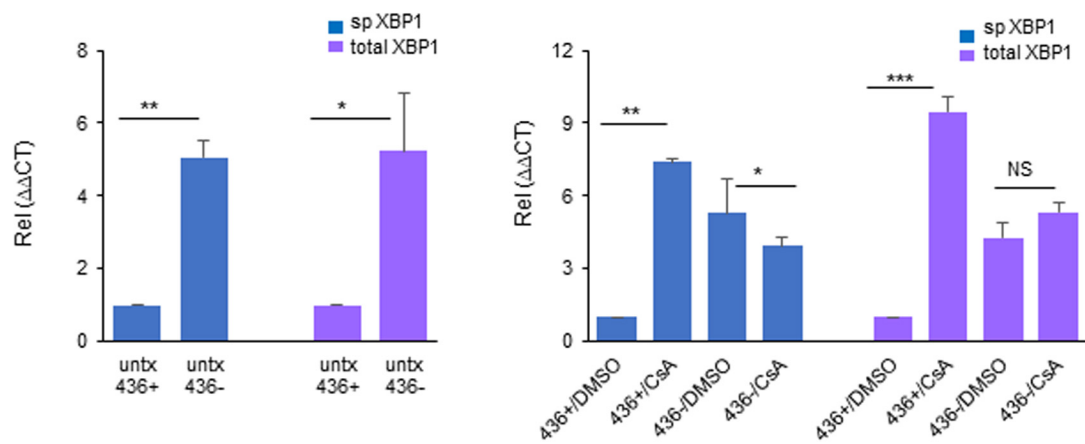**Figure S9**

**Figure S8. Analysis of UPR components protein level in untreated, DMSO-treated or CsA-treated MDA-MB-436 breast cancer cells,**  
Related to Figure 5.

BRCA1-replete (+) and BRCA1-deficient (def) breast cancer cells were either untreated, treated with DMSO (vehicle) or treated with 1  $\mu$ M CsA for 2 days. Cells were harvested for (A) protein or (B) mRNAs analysis. p-PERK = phospho-PERK. p-IRE1 = phospho-IRE1. p-eIF2a = phospho-eIF2a. sp = spliced XBP1. IB = immunoblotting.

Results were calculated as means  $\pm$  SD. P value was calculated by student's t-test.
